# Supplementary material
Source: PubMed Central journal article supplement (PMC3369744)
Supplement: cn200002t_si_001.pdf [file cn200002t_si_001.pdf]

## Supporting information for

### Rhodanine and thiohydantoin derivatives for detecting tau pathology

#### in Alzheimer's brains

Masahiro Ono,<sup>\*,†</sup> Shun Hayashi,<sup>†</sup> Kenji Matsumura,<sup>†</sup> Hiroyuki Kimura,<sup>†</sup> Yoko Okamoto,<sup>‡</sup>

Masafumi Ihara,<sup>‡</sup> Ryosuke Takahashi,<sup>‡</sup> Hiroshi Mori,<sup>‡</sup> Hideo Saji,<sup>\*,†</sup>

<sup>†</sup>Graduate School of Pharmaceutical Sciences, Kyoto University, 46-29 Yoshida Shimoadachi-cho, Sakyo-ku, Kyoto 606-8501, Japan. <sup>‡</sup>Graduate School of Medicine, Kyoto University, <sup>‡</sup>Department of Neuroscience, Osaka City University Medical School, 1-4-3 Asahi-machi, Abeno-ku, Osaka 545-8585.

### **Saturation assay with thioflavin-S using recombinant tau and A $\beta$ <sub>1-42</sub> aggregates**

The 441-aa isoform of human tau was expressed from a cDNA clone in *Escherichia coli* and purified as described previously(1). Tau aggregates were prepared by incubating tau protein (1 mg/mL in MES buffer, pH 6.8) at 37°C for 8 days with gentle and constant shaking in the presence of 0.1 mg/mL heparin(2). A solid form of A $\beta$ <sub>1-42</sub> was purchased from Peptide Institute (Osaka, Japan). Aggregation was achieved by gently dissolving the peptide (0.25 mg/mL) in phosphate buffered-saline solution (pH 7.4). The solutions were incubated at 37 °C for 42 h with gentle and constant shaking. The binding experiments were carried out in Protein LoBind Tubes (Eppendorf). A mixture of tau aggregates (final conc., 0.2  $\mu$ M) or A $\beta$ <sub>1-42</sub> aggregates (final conc., 2.2  $\mu$ M) were incubated at room temperature for 30 min in the presence of ThS (final conc., 0.2-15  $\mu$ M), dispensed to MULTI WELL PLATE (0.4 mL  $\times$  96 wells flatbottom, SUMITOMO BAKELITE CO., LTD, Japan), and subjected to fluorescence spectroscopy ( $\lambda_{\text{ex}} = 440$  nm;  $\lambda_{\text{em}} = 510$  nm). The fluorescence intensity ( $\lambda_{\text{ex}} = 440$  nm;  $\lambda_{\text{em}} = 510$  nm) was plotted and  $K_d$  values of thioflavin-S for recombinant tau and A $\beta$ <sub>1-42</sub> aggregates were calculated from saturation curves using GraphPad Prism software

(Graph Pad software, San Diego, CA) (Figure S1). The  $K_d$  value for tau and A $\beta$  aggregates were 0.63 and 2.2  $\mu$ M, respectively.

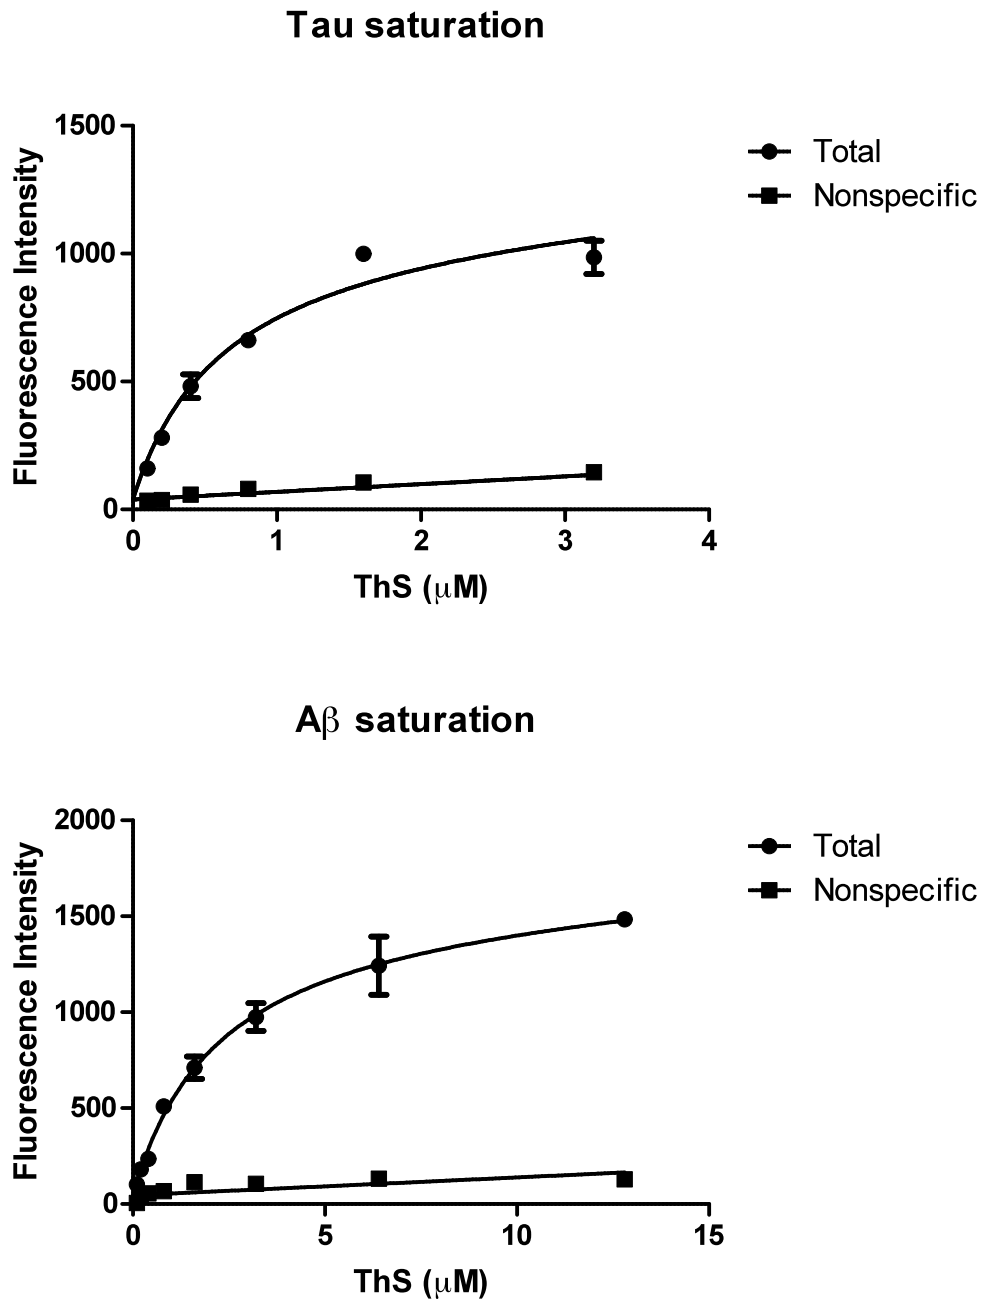

**Figure S1.** Binding of ThS to tau aggregates (upper panel) and A $\beta$  aggregates (lower panel).

## References

1. Han, D., Qureshi, H. Y., Lu, Y., and Paudel, H. K. (2009) Familial FTDP-17 missense mutations inhibit microtubule assembly-promoting activity of tau by increasing phosphorylation at Ser202 in vitro, *J Biol Chem* 284, 13422-13433.
2. Okamura, N., Suemoto, T., Furumoto, S., Suzuki, M., Shimadzu, H., Akatsu, H., Yamamoto, T., Fujiwara, H., Nemoto, M., Maruyama, M., Arai, H., Yanai, K., Sawada, T., and Kudo, Y. (2005) Quinoline and benzimidazole derivatives: candidate probes for *in vivo* imaging of tau pathology in Alzheimer's disease, *J Neurosci* 25, 10857-10862.
